# Supplementary material for: Self-supported branched poly(ethyleneimine) materials for CO2 adsorption from simulated flue gas
Source: Royal Society of Chemistry journal article supplement (doi:10.1039/c9ta04662c), 2019-01-01
Supplement: c9ta04662c2.pdf [file c9ta04662c2.pdf]

**Supporting information**

**Self-supported branched Poly(ethyleneimine) Materials for CO<sub>2</sub> Adsorption from**

**Simulated Flue Gas**

Chun-Jae Yoo, Pavithra Narayanan, Christopher W. Jones\*

School of Chemical & Biomolecular Engineering, Georgia Institute of Technology,

311 Ferst Drive NW Atlanta Georgia 30332 United States

[cjones@chbe.gatech.edu](mailto:cjones@chbe.gatech.edu)

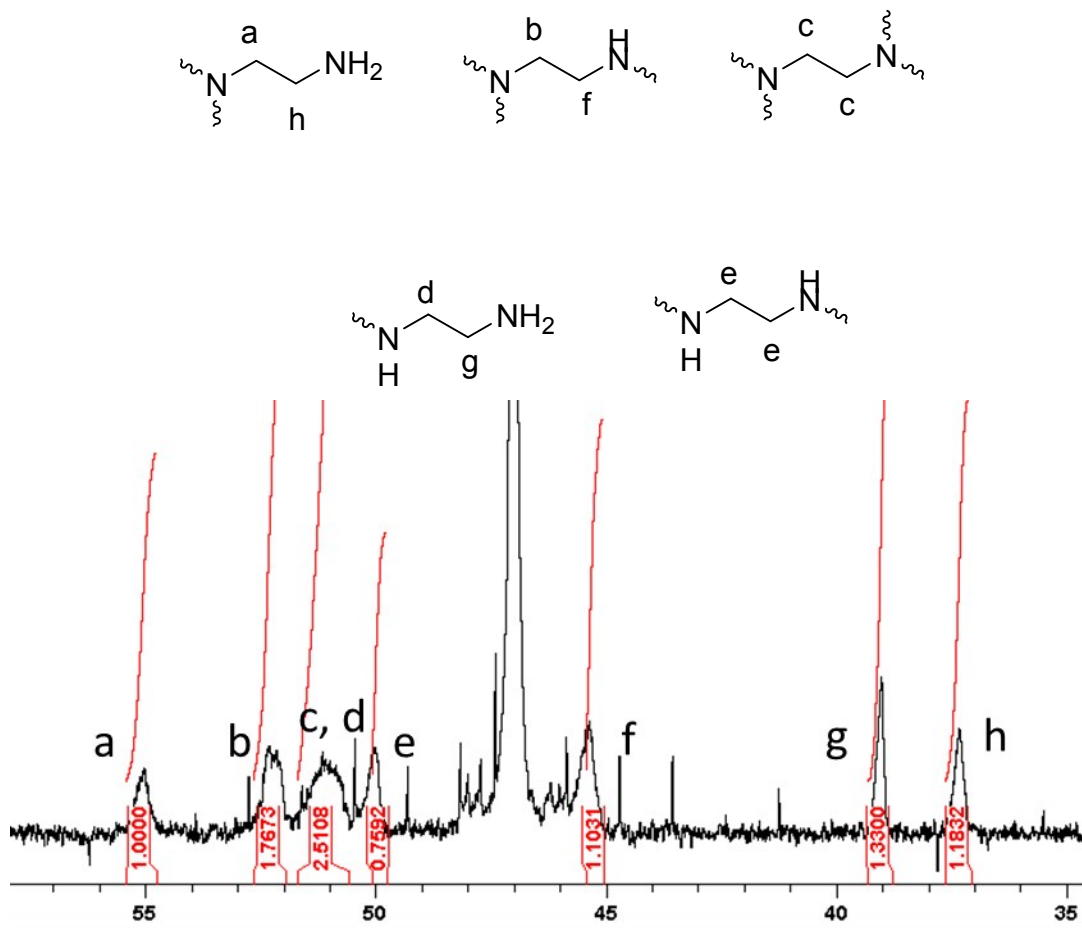

**Figure S1.** Liquid state  $^{13}\text{C}$  NMR of the b-PEI (60 kda)

Primary :  $g+h = 1.33+1.18 = 2.51$

Secondary:  $(d+e+f)/2 = (1.33+1.52+2.21= 5.06)/2 = 2.53$

Tertiary:  $(a+b+c)/3 = (1+1.77+1.18= 3.95)/3 = 1.316$

**Primary/ Secondary/Tertiary = 40/40/20**

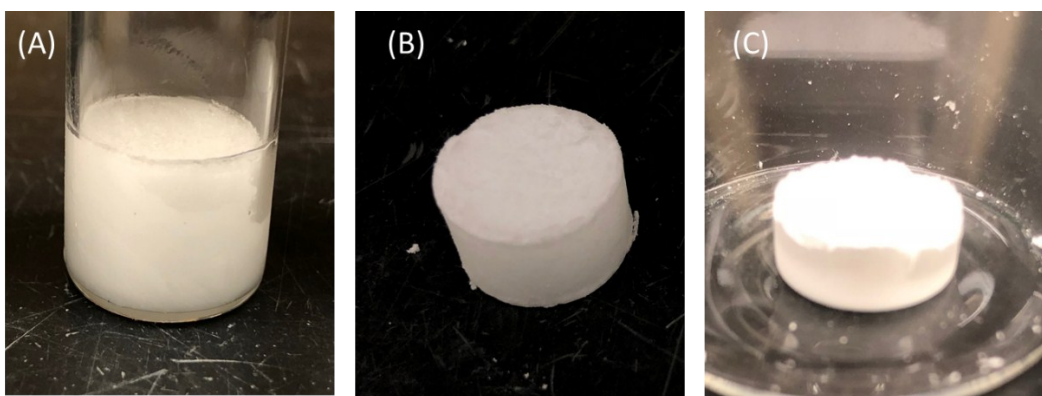

**Figure S2.** The images of crosslinked PEI adsorbents (A) after 2 days storage in the freezer (B) after collecting from the vial (C) after drying under vacuum at 60 °C

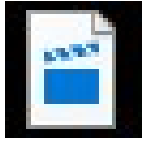

IMG\_1574.MOV

Video S1.

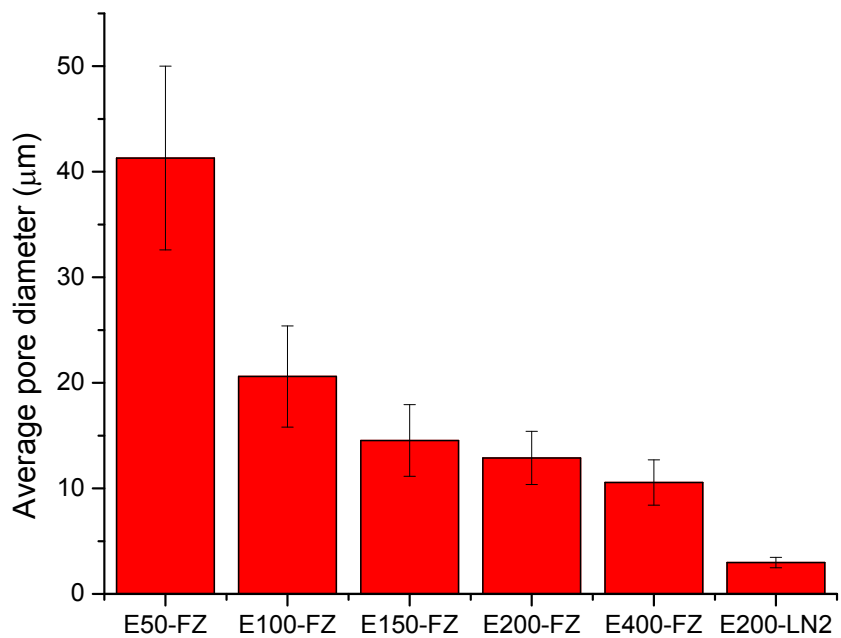

**Figure S3.** The average pore diameter of the self-supported PEI adsorbents. The average pore size of the material was estimated by using imaging program (Digimizer). (Error bars from the standard deviation of more than 30 pores imaged via microscopy)

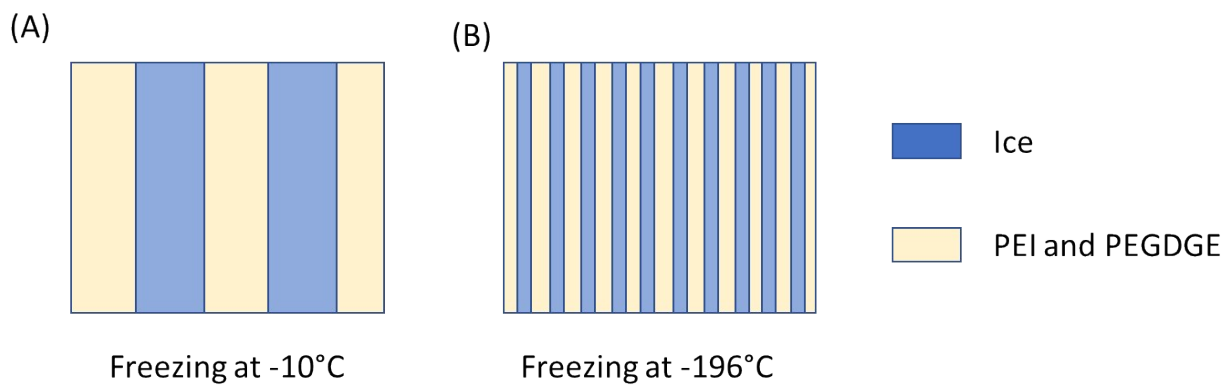

**Figure S4.** The schematic configuration of the ice and the suspension (mixture of PEI and PEGDGE) depending on the freezing temperature (A)  $-10^{\circ}\text{C}$  (B)  $-196^{\circ}\text{C}$

**Table S1.** Summary of PEI based adsorbents and their CO<sub>2</sub> capacity at given conditions

| Amine | Support                    | Amine Loading (wt.%) | CO <sub>2</sub> conc (%) | Adsorption temp (°C) | Amine efficiency | CO <sub>2</sub> capacity (mmol CO <sub>2</sub> /g) | ref |
|-------|----------------------------|----------------------|--------------------------|----------------------|------------------|----------------------------------------------------|-----|
| PEI   | MCM-41                     | 50                   | 100                      | 75                   | 0.27             | 2.54                                               | 1   |
|       |                            | 50                   | 100                      | 50                   | 0.11             | 1                                                  |     |
|       |                            | 75                   | 100                      | 75                   | 0.21             | 3.02                                               |     |
| PEI   | SBA-15                     | 50                   | 100                      | 25                   | 0.09             | 0.83                                               | 2   |
|       |                            | 50                   | 100                      | 45                   | 0.18             | 1.7                                                |     |
|       |                            | 50                   | 100                      | 75                   | 0.21             | 2.04                                               |     |
|       |                            | 70                   | 100                      | 45                   | 0.17             | 2                                                  |     |
| PEI   | SBA-15                     | 50                   | 15                       | 75                   | 0.27             | 3.18                                               | 3   |
| PEI   | SBA-15                     | 50                   | 12                       | 75                   | 0.14             | 1.358                                              | 4   |
|       |                            | 50                   | 12                       | 55                   | 0.14             | 1.295                                              |     |
| PEI   | KIT-6                      | 50                   | 100                      | 75                   | 0.27             | 3.06                                               | 5   |
| PEI   | KIT6                       | 50                   | 100                      | 25                   | 0.16             | 1.79                                               |     |
| PEI   | monolith                   | 65                   | 5                        | 75                   | 0.32             | 3.75                                               | 6   |
| PEI   | PMMA                       | 40                   | 10                       | 45                   | 0.32             | 2.4(3.53)                                          | 7   |
| PEI   | SiO <sub>2</sub> (cariACT) | 40                   | 10                       | 45                   | 0.34             | 2.55(3.65)                                         |     |
| PEI   | SiO <sub>2</sub> capsule   | 83                   | 10                       | 75                   | 0.3              | 4.45 (5.58)                                        | 8   |
| PEI   | PE-MCM-41                  | 55                   | 100                      | 25                   | 0.17             | 1.8                                                | 9   |
|       |                            | 55                   | 100                      | 50                   | 0.22             | 2.27                                               |     |
|       |                            | 55                   | 100                      | 75                   | 0.43             | 4.5                                                |     |
|       |                            | 55                   | 10                       | 25                   | 0.13             | 1.36                                               |     |
|       |                            | 55                   | 10                       | 50                   | 0.22             | 2.27                                               |     |
|       |                            | 55                   | 10                       | 75                   | 0.33             | 3.41                                               |     |
| PEI   | Silica monolith            | 60                   | 100                      | 75                   | 0.21             | 2.4                                                | 10  |
|       |                            | 60                   | 20                       | 75                   | 0.04             | 0.5                                                |     |
|       |                            | 60                   | 100                      | 25                   | 0.09             | 1                                                  |     |
| PEI   | Silica monolith            | 50                   | 100                      | 80                   | 0.39             | 3.78                                               | 11  |
| PEI   | Spherical silica foams     | 60                   | 100                      | 75                   | 0.33             | 4.27                                               | 12  |
| PEI   | MCF                        | 50                   | 100                      | 75                   | 0.36             | 4.11                                               | 13  |
| PEI   | MCF                        | 50                   | 15                       | 75                   | 0.3              | 3.45                                               | 14  |
| PEI   | HMS                        | 45                   | 100                      | 75                   | 0.26             | 2.7                                                | 15  |
| PEI   | SBA-15PLT                  | 55                   | 10                       | 25                   | 0.2              | 2.56                                               | 16  |
|       |                            |                      | 10                       | 50                   | 0.3              | 3.775                                              |     |
|       |                            |                      | 10                       | 75                   | 0.31             | 3.92                                               |     |
| PEI   | SBA-15                     | 48                   | 15                       | 75                   | 0.21             | 2.38                                               | 17  |

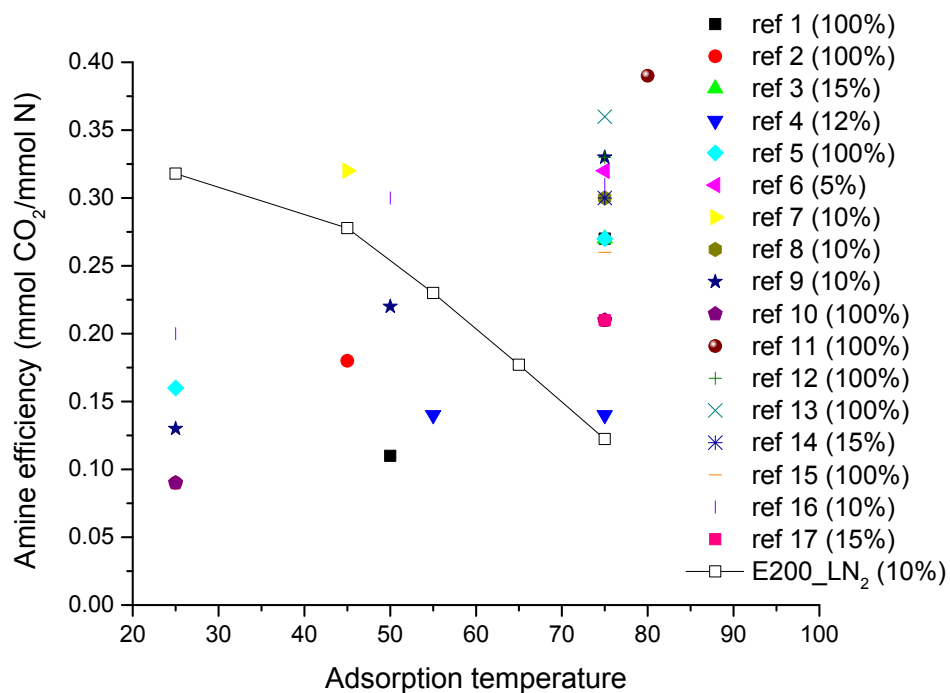

**Figure S5.** Amine efficiency of supported PEI adsorbent under various CO<sub>2</sub> concentrations (5-100%)



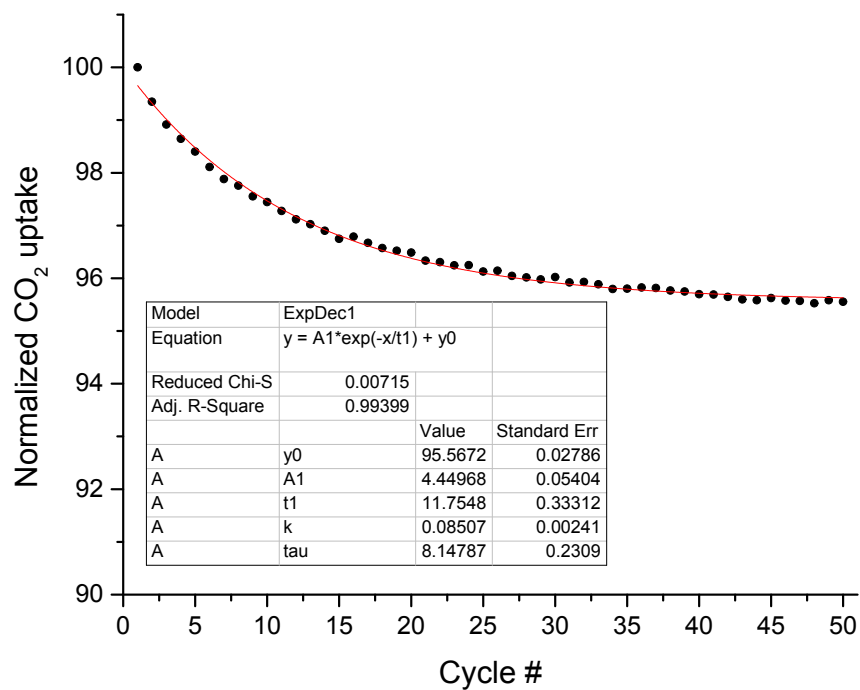

**Figure S6.** Normalized CO<sub>2</sub> uptakes along with the increasing number of cycle and fitted exponential decay equation.

## References

- 1 X. Xu, C. Song, J. M. Andresen, B. G. Miller and A. W. Scaroni, *Energy and Fuels*, 2002, **16**, 1463–1469.
- 2 R. Sanz, G. Calleja, A. Arencibia and E. S. Sanz-Pérez, *Appl. Surf. Sci.*, 2010, **256**, 5323–5328.
- 3 X. Ma, X. Wang and C. Song, *J. Am. Chem. Soc.*, 2009, **131**, 5777–5783.
- 4 S. Dasgupta, A. Nanoti, P. Gupta, D. Jena, A. N. Goswami and M. O. Garg, *Sep. Sci. Technol.*, 2009, **44**, 3973–3983.
- 5 W.-J. Son, J.-S. Choi and W.-S. Ahn, *Microporous Mesoporous Mater.*, 2008, **113**, 31–40.
- 6 C. Chen, S.-T. Yang, W.-S. Ahn and R. Ryoo, *Chem. Commun.*, 2009, 3627–3629.
- 7 M. L. Gray, J. S. Hoffman, D. C. Hreha, D. J. Fauth, S. W. Hedges, K. J. Champagne and H. W. Pennline, *Energy & Fuels*, 2009, **23**, 4840–4844.
- 8 G. Qi, Y. Wang, L. Estevez, X. Duan, N. Anako, A.-H. A. Park, W. Li, C. W. Jones, E. P. Giannelis, A.-H. Alissa Park, W. Li, C. W. Jones and E. P. Giannelis, *Energy Environ. Sci.*, 2011, **4**, 444.
- 9 A. Heydari-Gorji, Y. Belmabkhout and A. Sayari, *Langmuir*, 2011, **27**, 12411–12416.
- 10 X. Guo, L. Ding, K. Kanamori, K. Nakanishi and H. Yang, *Microporous Mesoporous Mater.*, 2017, **245**, 51–57.
- 11 T. Witoon and M. Chareonpanich, *Mater. Lett.*, 2012, **81**, 181–184.
- 12 Y. Han, G. Hwang, H. Kim, B. Z. Haznedaroglu and B. Lee, *Chem. Eng. J.*, 2015, **259**, 653–662.
- 13 J. Zhao, F. Simeon, Y. Wang, G. Luo and T. A. Hatton, *RSC Adv.*, 2012, **2**, 6509–6519.
- 14 X. Yan, L. Zhang, Y. Zhang, K. Qiao, Z. Yan and S. Komarneni, *Chem. Eng. J.*, 2011, **168**, 918–924.
- 15 C. Chen, W.-J. Son, K.-S. You, J.-W. Ahn and W.-S. Ahn, *Chem. Eng. J.*, 2010, **161**, 46–52.
- 16 A. Heydari-Gorji, Y. Yang and A. Sayari, *Energy & Fuels*, 2011, **25**, 4206–4210.
- 17 X. Yan, L. Zhang, Y. Zhang, G. Yang and Z. Yan, *Ind. Eng. Chem. Res.*, 2011, **50**, 3220–3226.
